# Supplementary material
Source: Research Square preprint supplement (doi:10.21203/rs.3.rs-9162670/v1)
Supplement: Supplementary file 1 [file 0b62d498b9304cf3e81799b7.docx]

**Global Inequities in Preeclampsia Research: A Scoping Review of Drug Repurposing Clinical Trials (2000–2025)**

**Supplementary contents:**

- Supplementary Material 1: PRISMA-ScR Checklist
- Supplementary Material 2: Search strategy for each engine.
- Supplementary Material 3 Included studies
- Supplementary Material 4: Reasons for exclusion of studies.

**Preferred Reporting Items for Systematic reviews and Meta-Analyses extension for Scoping Reviews (PRISMA-ScR) Checklist**

| **SECTION** | **ITEM** | **PRISMA-ScR CHECKLIST ITEM** | **REPORTED ON PAGE #** |
| --- | --- | --- | --- |
| **TITLE** | | | |
| Title | 1 | Identify the report as a scoping review. | 1 |
| **ABSTRACT** | | | |
| Structured summary | 2 | Provide a structured summary that includes (as applicable): background, objectives, eligibility criteria, sources of evidence, charting methods, results, and conclusions that relate to the review questions and objectives. | 1 |
| **INTRODUCTION** | | | |
| Rationale | 3 | Describe the rationale for the review in the context of what is already known. Explain why the review questions/objectives lend themselves to a scoping review approach. | 2 |
| Objectives | 4 | Provide an explicit statement of the questions and objectives being addressed with reference to their key elements (e.g., population or participants, concepts, and context) or other relevant key elements used to conceptualize the review questions and/or objectives. | 2 |
| **METHODS** | | | |
| Protocol and registration | 5 | Indicate whether a review protocol exists; state if and where it can be accessed (e.g., a Web address); and if available, provide registration information, including the registration number. | 12 |
| Eligibility criteria | 6 | Specify characteristics of the sources of evidence used as eligibility criteria (e.g., years considered, language, and publication status), and provide a rationale. | 2 |
| Information sources* | 7 | Describe all information sources in the search (e.g., databases with dates of coverage and contact with authors to identify additional sources), as well as the date the most recent search was executed. | 2 |
| Search | 8 | Present the full electronic search strategy for at least 1 database, including any limits used, such that it could be repeated. | 2 |
| Selection of sources of evidence† | 9 | State the process for selecting sources of evidence (i.e., screening and eligibility) included in the scoping review. | 2 |
| Data charting process‡ | 10 | Describe the methods of charting data from the included sources of evidence (e.g., calibrated forms or forms that have been tested by the team before their use, and whether data charting was done independently or in duplicate) and any processes for obtaining and confirming data from investigators. | 2 |
| Data items | 11 | List and define all variables for which data were sought and any assumptions and simplifications made. | 2 |
| Critical appraisal of individual sources of evidence§ | 12 | If done, provide a rationale for conducting a critical appraisal of included sources of evidence; describe the methods used and how this information was used in any data synthesis (if appropriate). | 11 |
| Synthesis of results | 13 | Describe the methods of handling and summarizing the data that were charted. | Not done |
| **RESULTS** | | | |
| Selection of sources of evidence | 14 | Give numbers of sources of evidence screened, assessed for eligibility, and included in the review, with reasons for exclusions at each stage, ideally using a flow diagram. | 2-5 |
| Characteristics of sources of evidence | 15 | For each source of evidence, present characteristics for which data were charted and provide the citations. | 3 |
| Critical appraisal within sources of evidence | 16 | If done, present data on critical appraisal of included sources of evidence (see item 12). | 3 |
| Results of individual sources of evidence | 17 | For each included source of evidence, present the relevant data that were charted that relate to the review questions and objectives. | 3-4 |
| Synthesis of results | 18 | Summarize and/or present the charting results as they relate to the review questions and objectives. | 6-7 |
| **DISCUSSION** | | | |
| Summary of evidence | 19 | Summarize the main results (including an overview of concepts, themes, and types of evidence available), link to the review questions and objectives, and consider the relevance to key groups. | 8-10 |
| Limitations | 20 | Discuss the limitations of the scoping review process. | 11-12 |
| Conclusions | 21 | Provide a general interpretation of the results with respect to the review questions and objectives, as well as potential implications and/or next steps. | 9-10 |
| **FUNDING** | | | |
| Funding | 22 | Describe sources of funding for the included sources of evidence, as well as sources of funding for the scoping review. Describe the role of the funders of the scoping review. | 5 |

JBI = Joanna Briggs Institute; PRISMA-ScR = Preferred Reporting Items for Systematic reviews and Meta-Analyses extension for Scoping Reviews.

* Where *sources of evidence* (see second footnote) are compiled from, such as bibliographic databases, social media platforms, and Web sites.

† A more inclusive/heterogeneous term used to account for the different types of evidence or data sources (e.g., quantitative and/or qualitative research, expert opinion, and policy documents) that may be eligible in a scoping review as opposed to only studies. This is not to be confused with *information sources* (see first footnote).

‡ The frameworks by Arksey and O’Malley (6) and Levac and colleagues (7) and the JBI guidance (4, 5) refer to the process of data extraction in a scoping review as data charting*.*

§The process of systematically examining research evidence to assess its validity, results, and relevance before using it to inform a decision. This term is used for items 12 and 19 instead of "risk of bias" (which is more applicable to systematic reviews of interventions) to include and acknowledge the various sources of evidence that may be used in a scoping review (e.g., quantitative and/or qualitative research, expert opinion, and policy document).

*From:* Tricco AC, Lillie E, Zarin W, O'Brien KK, Colquhoun H, Levac D, et al. PRISMA Extension for Scoping Reviews (PRISMAScR): Checklist and Explanation. Ann Intern Med. 2018;169:467–473. [doi: 10.7326/M18-0850](http://annals.org/aim/fullarticle/2700389/prisma-extension-scoping-reviews-prisma-scr-checklist-explanation).

**Supplementary Material 2: Search Strategy**

[**Clinicaltrials.gov**](http://clinicaltrials.gov) **“893 records”**

Condition: "Preeclampsia" OR "Pre-eclampsia" OR "Hypertensive Disorders of Pregnancy"

Intervention:"Pravastatin" OR "statin" OR “rosuvastatin” OR "Metformin" OR "Esomeprazole" OR "Omeprazole" OR "Proton pump inhibitor" OR "Sildenafil" OR "Tadalafil" OR "Melatonin" OR "Hydroxychloroquine" OR "repurposing" OR "repurposed".

**ICTRP “1310 records”**

Condition: "Preeclampsia" OR "Pre-eclampsia" OR "Hypertensive Disorders of Pregnancy"

Intervention:"Pravastatin" OR "statin" OR “rosuvastatin” OR "Metformin" OR "Esomeprazole" OR "Omeprazole" OR "Proton pump inhibitor" OR "Sildenafil" OR "Tadalafil" OR "Melatonin" OR "Hydroxychloroquine" OR "repurposing" OR "repurposed".

**Supplementary Material 3: Studies included**

| **Registry ID** | **Autor** | **Year** | **Study Title** | **Clinical purpose** | **Intervention** | **Pharmacological Group** | **Primary Outcome** | **Location** | **Source** |
| --- | --- | --- | --- | --- | --- | --- | --- | --- | --- |
| NCT03724838 | Salam HF | 2018 | Esomeprazole With Sildenafil Citrate in Women With Early-onset Preeclampsia | Treatment | Esomeprazole+Sildenafil | PPI+PDE-5 inhibitor | Prolongation of gestation | Egypt | [ClinicalTrials.gov](http://clinicaltrials.gov/) |
| NCT01717586 | Costantine M | 2012 | Pravastatin for Preeclampsia Prevention | Prevention | Pravastatin | Statin | Maternal and fetal adverse events | USA | [ClinicalTrials.gov](http://clinicaltrials.gov/) |
| NCT03648970 | Aldika MI | 2018 | Indonesia Pravastatin to Prevent Preeclampsia Study | Prevention | Pravastatin + Aspirin vs Aspirin | Statin + Antiplatelet | Preeclampsia, preterm delivery and maternal complications | Indonesia | [ClinicalTrials.gov](http://clinicaltrials.gov/) |
| NCT06452498 | R.C. Painter | 2024 | Preeclampsia Intervention Netherlands (PI-NL) | Treatment | Metformin | Biguanide | Prolongation of gestation | Netherlands | [ClinicalTrials.gov](http://clinicaltrials.gov/) |
| NCT03717701 | Sallam HF | 2019 | Metformin and Esomeprazole in Treatment of Early Onset Preeclampsia | Treatment | Metformin + Esomeprazole | Biguanide + PPI | Prolongation of gestation | Australia | [ClinicalTrials.gov](http://clinicaltrials.gov/) |
| NCT06359015 | Bowden D | 2021 | Metformin and Esomeprazole in Preterm Pre-eclampsia | Treatment | Metformin + Esomeprazole | Biguanide + PPI | Change in plasma sFlt-1 levels | USA | [ClinicalTrials.gov](http://clinicaltrials.gov/) |
| NCT00141310 | Samangaya RA | 2004 | Sildenafil Citrate for the Treatment of Established Pre-Eclampsia | Treatment | Sildenafil | PDE-5 inhibitor | Time to delivery | United Kingdom | [ClinicalTrials.gov](http://clinicaltrials.gov/) |
| NCT03262961 | Abdallah F | 2016 | Use of Sildenafil Citrate in Management of Mild Pre-eclampsia | Treatment | Sildenafil | PDE-5 inhibitor | Gestational age at delivery and progression to severe preeclampsia | Egypt | [ClinicalTrials.gov](http://clinicaltrials.gov/) |
| NCT03717740 | Sallam HF | 2018 | Esomeprazole for the Prevention of Preeclampsia | Prevention | Esomeprazole | PPI | Early-onset preeclampsia | Egypt | [ClinicalTrials.gov](http://clinicaltrials.gov/) |
| NCT05287321 | Kim YM | 2022 | The Efficacy of Aspirin Combined With Hydroxychloroquine Treatment in High Risk Pregnancies for Preeclampsia | Treatment | Hydroxychloroquine | Antimalarial | Composite maternal-fetal morbidity | South Korea | [ClinicalTrials.gov](http://clinicaltrials.gov/) |
| NCT02314286 | Beharier O | 2014 | Rosuvastatin in Order to Induce Preeclampsia Resolution in Severe PET up to 48 Hours Following Delivery | Treatment | Rosuvastatin | Statin | Resolution of severe preeclampsia | Israel | [ClinicalTrials.gov](http://clinicaltrials.gov/) |
| NCT03213639 | Abbas A | 2018 | Esomeprazole in Treatment of Early Onset Preeclampsia (ESOPE Trial) | Treatment | Esomeprazole | PPI | HELLP syndrome incidence Change in plasma sFlt-1 levels | Egypt | [ClinicalTrials.gov](http://clinicaltrials.gov/) |
| NCT04755322 | Mohammed AM | 2021 | Hydroxychloroquine in Prevention of Preeclampsia | Prevention | Hydroxychloroquine | Antimalarial | Preeclampsia incidence | Egypt | [ClinicalTrials.gov](http://clinicaltrials.gov/) |
| NCT02782559 | Roberts RP | 2016 | Efficacy of Sildenafil in Preterm Preeclampsia | Treatment | Sildenafil | PDE-5 inhibitor | Pregnancy latency | United States | [ClinicalTrials.gov](http://clinicaltrials.gov/) |
| NCT06033131 | Bergman L | 2024 | PI4 - A Trial Assessing Metformin to Prolong Gestation in Preterm Preeclampsia | Treatment | Metformin | Biguanide | Pregnancy prolongation | Sweden | [ClinicalTrials.gov](http://clinicaltrials.gov/) |
| NCT03944512 | Costantine M | 2019 | Pravastatin to Prevent Preeclampsia | Prevention | Pravastatin | Statin | Preeclampsia incidence | United States | [ClinicalTrials.gov](http://clinicaltrials.gov/) |
| NCT04855513 | Lakshmi J | 2022 | Prevention of Pre-eclampsia Using Metformin: a Randomized Control Trial | Prevention | Metformin | Biguanide | Preeclampsia incidence | Qatar | [ClinicalTrials.gov](http://clinicaltrials.gov/) |
| NCT05580523 | Yee C | 2023 | Aspirin Versus Metformin in Pregnancies at High Risk of Preterm Preeclampsia: a 3-arm Randomized Controlled Trial | Prevention | Metformin | Biguanide | Incidence of preterm preeclampsia | China | [ClinicalTrials.gov](http://clinicaltrials.gov/) |
| NCT03570632 | Feghali MN | 2019 | Metformin for Preeclampsia Prevention in Pregnant Women With Type 1 Diabetes Mellitus | Prevention | Metformin | Biguanide | Incidence of hypertensive disorders of pregnancy | United States | [ClinicalTrials.gov](http://clinicaltrials.gov/) |
| NCT00159536 | Vanky EI | 2005 | Metformin in Pregnant PCOS Women | Prevention | Metformin | Biguanide | Preeclampsia; Preterm delivery; Gestational diabetes; Metabolic syndrome in offspring | Norway | [ClinicalTrials.gov](http://clinicaltrials.gov/) |
| IRCT20140317017035N9 | Kasraeian M | 2024 | Effectiveness of aspirin and aspririnmetformin in prevention of preeclampsia | Prevention | Aspirin; Aspirin + Metformin | Antiplatelet; Biguanide | Incidence of preeclampsia | Iran | WHO ICTRP |
| IRCT20230930059563N1 | Alishahi M | 2023 | The effect of melatonin in the prevention of preeclampsia | Prevention | Aspirin + Melatonin; Aspirin | Antiplatelet; Melatonin receptor agonist | Occurrence of preeclampsia | Iran | WHO ICTRP |
| IRCT20230730058975N1 | Behzdfar V | 2023 | Metformin in the prevention of preeclampsia | Prevention | Metformin | Biguanide | Preeclampsia | Iran | WHO ICTRP |
| IRCT20210316050725N1 | Ahmadi S | 2021 | Evaluation of the effect of metformin in prevention from severe preeclampsia | Prevention | Metformin ; Placebo | Biguanide | Severe preeclampsia | Iran | WHO ICTRP |
| ChiCTR1900026972 | Gu S | 2019 | A randomized controlled trial for efficacy of esomeprazole in the treatment of early-onset preeclampsia | Treatment | Esomeprazole | PPI | Gestational weeks | China | WHO ICTRP |
| NL-OMON22488 | Neuman R | 2019 | Potential effect of proton-pump inhibitor on angiogenic markers in preeclampsia | Treatment | Omeprazole | PPI | Change in plasma sFlt-1 levels | Netherlands | WHO ICTRP |
| IRCT20190201042577N1 | Kamkar A | 2019 | The therapeutic effect of Sildenafil Citrate on maternal and fetal outcomes of pregnancies associated with severe preeclampsia | Treatment | Sildenafil | Phosphodiesterase inhibitor | Resolution of severe preeclampsia | Iran | WHO ICTRP |
| ACTRN12618000690257 | Middleton A | 2018 | A Prospective PreecLampsia/Eclampsia Prevention Intervention (APPLE PIE): A randomised controlled trial determining the effect of esomeprazole on the incidence of preeclampsia in a cohort of nulliparous, high BMI women. | Prevention | esomeprazole | PPI | Incidence of preeclampsia | Australia;United Kingdom;Chile | WHO ICTRP |
| ISRCTN10186987 | Petousis S | 2018 | Effect of PRAvastatin in Pregnancies complicated by Ischemical Placental Disease: prospective observational study | Treatment | Pravastatin | Statin | Pregnancy prolongation; Perinatal mortality | Greece | WHO ICTRP |
| JPRN-UMIN000027270 | Ikeda T | 2017 | A study on Prevention of Hypertensive Disorders of Pregnancy who have a history of severe hypertensive disorders of pregnancy -Pre-test for multi center trial- | Prevention | Tadalafil | Phosphodiesterase inhibitor | Recurrence rate of Hypertensive Disorders of Pregnancy | Japan | WHO ICTRP |
| JPRN-UMIN000020686 | Io S | 2016 | Statin therapy for preeclampsia - Statin therapy for preeclampsia | Treatment | Pravastatin 10mg, Pravastatin 20mg | Statin | Maternal clinical and biochemical parameters | Japan | WHO ICTRP |
| PACTR201504000771349 | Cluver C | 2014 | The Preeclampsia Intervention with esomeprazole (PIE) trial: a double blind randomised, placebo-controlled trial to treat early onset severe preeclampsia | Treatment | Esomeprazole | PPI | Prolongation of gestation | South Africa | WHO ICTRP |
| ACTRN12613000476730 | Hobson S | 2013 | A pilot study of antenatal maternally administered melatonin in human pregnancies affected by preterm preeclampsia to prolong pregnancy | Treatment | Melatonin | Melatonin | Pregnancy prolongation | Australia | WHO ICTRP |
| ACTRN12613000268741 | Brownfoot F | 2013 | In patients with early onset preeclampsia does the addition of pravastatin compared to current practice (historical cohort from 2006) lead to a reduction in symptoms and signs and prolongation of pregnancy? | Treatment | Pravastatin | Statin | Pregnancy prolongation; Proteinuria reduction | Australia | WHO ICTRP |
| NCT07098975 | Llurba Olivé E | 2025 | Statin Intervention for Severe Early-Onset Placental Insufficiency | Treatment | Pravastatin | Statin | Pregnancy prolongation | Spain | WHO ICTRP |
| CTRI/2025/01/079586 | Suhane M | 2025 | Comparing the efficacy of metformin plus aspirin with aspirin alone in preventing preeclampsia in high risk pregnancies: a randomized controlled trial | Prevention | aspirin + metformin | Biguanide; Antiplatelet | Prevention of preeclampsia | India | WHO ICTRP |
| ACTRN12618001755224 | Hyett J | 2018 | Can esomeprazole improve outcomes in women at high risk of pre-eclampsia? A phase II placebo-controlled randomised multi-centre clinical trial. The ESPRESSO Study | Prevention | Esomeprazole + aspirin | PPI; Antiplatelet | Blood pressure (mean arterial pressure) | Australia;Pakistan (Australia) | WHO ICTRP |
| PACTR201608001752102 | Cluver C | 2016 | Pre-eclampsia Intervention 2 (PI2) trial: a double blind randomised control trial of metformin for the treatment of early onset pre-eclampsia | Treatment | Metformin | Biguanide | Pregnancy prolongation | South Africa | WHO ICTRP |
| ISRCTN17787139 | Poon L | 2015 | RandomiSed conTrolled trial with prAvasTatin versus placebo for preventIoN of preeclampsia | Prevention | Pravastatin | Statin | Incidence of preeclampsia | Spain;United Kingdom (Spain) | WHO ICTRP |
| ISRCTN23410175 | Ahmed A | 2009 | A proof of principle, double-blind, randomised placebo-controlled, multicentre trial of pravastatin to ameliorate early onset pre-eclampsia | Prevention | pravastatin | Biguanide | Change in plasma sFlt-1 levels | United Kingdom | WHO ICTRP |
| IRCT20191104045328N14 | Maktabi M | 2022 | The effect of metformin on the incidence of preeclampsia in pregnant women with low pregnancy-associated plasma protein A | Prevention | Metformin | Biguanide | Maternal and perinatal outcomes | Iran | WHO ICTRP |
| IRCT20220107053652N1 | Farhbod F | 2022 | Evaluation of the effect of metformin and insulin combination therapy in comparison with the use of insulin alone in the prevention of preeclampsia in pregnant women with gestational diabetes | Prevention | Metformin ; insulin. | Biguanide; Insulin | Blood Pressure | Iran | WHO ICTRP |
| ISRCTN16123934 | Nicolaides K | 2018 | Randomised controlled trial with pravastatin versus placebo for prevention of preeclampsia | Prevention | Pravastatin | Statin | Incidence of preeclampsia | Belgium;England;Spain; Italy;Romania (Spain) | WHO ICTRP |
| IRCT20220928056050N1 | Azarbayejani N | 2022 | The effect of esomeprazole on preeclampsia in pregnant women | Treatment | Esomeprazole | PPI | Prolongation of gestation. | Iran | WHO ICTRP |
| CTRI/2021/08/035925 | Nivedita | 2021 | Preeclampsia and role of metformin in reducing incidence and severity of complications (PROMISE Trial) Placebo controlled Randomized Clinical Trial - PROMISE Trial | Treatment | Metformin | Biguanide | Maternal and perinatal outcomes | India | WHO ICTRP |
| PACTR201908560004686 | Taha O | 2019 | Efficacy of esomeprazole in the management of early preeclampsia. | Treatment | esomeprazole | PPI | Pregnancy prolongation | Egypt | WHO ICTRP |
| IRCT20120215009014N252 | Alimohamadi S | 2018 | Effect of using metformin versus not using on the incidence of gestational diabetes and preeclampsia in pregnant women with polycystic ovary: A randomized clinical trial | Prevention | metformin | Biguanide | Preeclampsia; Gestational diabetes | Iran | WHO ICTRP |

**Supplementary Material 4: Reasons for exclusion of studies.**

| **Registry ID** | **Study Title** | **Reason for exclusion** | **Source** |
| --- | --- | --- | --- |
| EUCTR2016-005206-19-BE | Randomised Controlled Trial with Pravastatin versus Placebo for Prevention of Preeclampsia - STATIN | Duplicate | WHO ICTRP |
| NCT06452498 | Preeclampsia Intervention Netherlands (PI-NL) | Duplicate | WHO ICTRP |
| NCT06359015 | Metformin and Esomeprazole in Preterm Pre-eclampsia | Duplicate | WHO ICTRP |
| CTIS2022-502707-29-00 | Preeclampsia Intervention 4 | Duplicate | WHO ICTRP |
| NCT05580523 | Aspirin Versus Metformin in Pregnancies at High Risk of Preterm Preeclampsia: a 3-arm Randomized Controlled Trial | Duplicate | WHO ICTRP |
| NCT05287321 | The Efficacy of Aspirin Combined With Hydroxychloroquine Treatment in High Risk Pregnancies for Preeclampsia | Duplicate | WHO ICTRP |
| NCT05232994 | Metformin and Esomeprazole For Preterm Pre-eclampsia | Duplicate | WHO ICTRP |
| NCT04855513 | Prevention of Pre-eclampsia Using Metformin: a Randomized Control Trial | Duplicate | WHO ICTRP |
| NCT04755322 | Hydroxychloroquine in Prevention of Preeclampsia | Duplicate | WHO ICTRP |
| NCT03944512 | Pravastatin to Prevent Preeclampsia | Duplicate | WHO ICTRP |
| NCT03724838 | Esomeprazole With Sildenafil Citrate in Women With Early-onset Preeclampsia | Duplicate | WHO ICTRP |
| NCT03717740 | Esomeprazole for the Prevention of Preeclampsia | Duplicate | WHO ICTRP |
| NCT03717701 | Metformin and Esomeprazole in Treatment of Early Onset Preeclampsia | Duplicate | WHO ICTRP |
| NCT03648970 | Indonesia Pravastatin to Prevent Preeclampsia Study | Duplicate | WHO ICTRP |
| NCT03262961 | Use of Sildenafil Citrate in Management of Mild Pre-eclampsia | Duplicate | WHO ICTRP |
| NCT03213639 | Esomeprazole in Treatment of Early Onset Preeclampsia (ESOPE Trial) | Duplicate | WHO ICTRP |
| EUCTR2016-005206-19-BE | Prevention of pre­eclampsia (high blood pressure): Randomised trial of Pravastatin versus placebo | Duplicate | WHO ICTRP |
| NCT02782559 | Efficacy of Sildenafil in Preterm Preeclampsia | Duplicate | WHO ICTRP |
| NCT01717586 | Pravastatin for Prevention of Preeclampsia | Duplicate | WHO ICTRP |
| NCT00141310 | Sildenafil Citrate for the Treatment of Established Pre-Eclampsia | Duplicate | WHO ICTRP |
